# Supplementary material for: Transcriptome analysis of the transdifferentiation of canine BMSCs into insulin producing cells
Source: BMC Genomics. 2021 Feb 25;22:134. doi: 10.1186/s12864-021-07426-3 (PMC7905582; doi:10.1186/s12864-021-07426-3)
Supplement: Supplementary file 4 — Additional file 4. Top 20 items of GO analysis of GEO data. “Enrichment Score” --- The overall enrichment score for each term members, the higher, the more enriched. “Count” --- The number of genes involved in individual term. “Banjamini” --- The modified Fisher Exact P-Value, the smaller, the more enriched. [file 12864_2021_7426_MOESM4_ESM.xlsx]

## Sheet: Sheet1
	Enrichment Score: 1.78	Count	P_Value	Benjamini
MF	FK506 binding	5	0.013	0.56
MF	peptidyl-prolyl cis-trans isomerase activity	7	0.018	0.6
BP	chaperone-mediated protein folding	6	0.02	0.84
	Enrichment Score: 1.33	Count	P_Value	Benjamini
MF	procollagen-proline 4-dioxygenase activity	3	0.023	0.67
MF	L-ascorbic acid binding	5	0.025	0.69
MF	oxidoreductase activity, acting on single donors with incorporation of molecular oxygen, incorporation of two atoms of oxygen	3	0.18	0.99
	Enrichment Score: 1.27	Count	P_Value	Benjamini
BP	microvillus assembly	4	0.019	0.84
BP	establishment of protein localization to plasma membrane	6	0.068	0.95
CC	microvillus	6	0.12	0.83
	Enrichment Score: 1.24	Count	P_Value	Benjamini
BP	positive regulation of tumor necrosis factor production	8	0.0039	0.66
BP	positive regulation of interleukin-6 production	6	0.061	0.94
BP	positive regulation of NF-kappaB transcription factor activity	10	0.078	0.96
BP	positive regulation of JNK cascade	6	0.18	0.99
BP	positive regulation of chemokine production	3	0.19	1
	Enrichment Score: 1.23	Count	P_Value	Benjamini
MF	zinc ion transmembrane transporter activity	6	0.0095	0.47
BP	zinc II ion transmembrane import	3	0.076	0.96
BP	cellular zinc ion homeostasis	3	0.29	1
	Enrichment Score: 0.96	Count	P_Value	Benjamini
MF	ion channel activity	5	0.017	0.61
BP	regulation of sodium ion transmembrane transporter activity	3	0.22	1
MF	sodium channel regulator activity	3	0.37	1
