# Supplementary material for: Transcriptome analysis of the transdifferentiation of canine BMSCs into insulin producing cells
Source: BMC Genomics. 2021 Feb 25;22:134. doi: 10.1186/s12864-021-07426-3 (PMC7905582; doi:10.1186/s12864-021-07426-3)
Supplement: Supplementary file 5 — Additional file 5. The software and main parameters. [file 12864_2021_7426_MOESM5_ESM.xlsx]

## Sheet: Sheet1
software	version	application	main parameter
HISAT2	v2.0.4	genomic alignment	--rna-strandness RF
StringTie	v1.3.1	assembly	reference based
Ballgown		quantification and DEGs	qvalue <0.05
Cuffdiff	v2.1.1	quantification and DEGs	qvalue <0.05
CNCI	v2	coding potential prediction	N/A
CPC	cpc-0.9-r2	coding potential prediction	evalue le-10
Pfam-scan	v1.3	protein domain screening	--E 0.;domE 0.001 ;--pfamB
PhyloCSF	20121028	coding potential prediction	--orf=ATGStop;--frames=3;'--removeRefGaps
GOSeq,topGO, hmmscan	Release2.12	GO enrichment	Wallenius;Padjust:BH
KOBAS	v2.0	KEGG enrichment	Blast le-10;padjust: BH
Blast	v2.2.28	protein interaction	evalue le-10
